# Supplementary material for: Selective conversion of furfural into tetrahydrofurfuryl alcohol using a heteropoly acid-based material as a hydrogenation catalyst
Source: Royal Society of Chemistry journal article supplement (doi:10.1039/d0se00861c), 2020-01-01
Supplement: d0se00861c1.pdf [file d0se00861c1.pdf]

## Supporting Information

### Selective Conversion of Furfural into Tetrahydrofurfuryl Alcohol using Heteropoly acid-based Material as Hydrogenation Catalyst

Paramita Koley<sup>a,b</sup>, B. Srinivasa Rao<sup>b</sup>, Ylias M. Sabri<sup>a</sup>, Suresh K. Bhargava<sup>a</sup>, J. Tardio<sup>a\*</sup> and N. Lingaiah<sup>b\*</sup>

(a) Centre for Advanced Materials & Industrial Chemistry (CAMIC), School of Applied Sciences, RMIT University, GPO BOX-2476, Melbourne 3001, Australia.

(b) Catalysis & Fine Chemicals Division, CSIR-Indian Institute of Chemical Technology, Hyderabad-500 607, India

#### Chemicals:

All chemicals used in this work were purchased from Sigma-Aldrich A. R. grade (99.9%) to synthesize different catalysts. Different chemicals such as  $\text{Na}_2\text{MoO}_4 \cdot 2\text{H}_2\text{O}$ ,  $\text{Pd}(\text{NO}_3)_2 \cdot 2\text{H}_2\text{O}$ ,  $\gamma\text{-Al}_2\text{O}_3$ ,  $\text{TiO}_2$ ,  $\text{SiO}_2$ ,  $\text{ZrO}_2$  and  $\text{Nb}_2\text{O}_5$  were implemented to prepare different catalysts. The solvents and reagents for example furfural, THFAL, FAL and isopropanol were purchased from both Sigma-Aldrich and Fisher Scientific. Double distilled water was used for the wet impregnation method to synthesize the catalysts.

#### Raman Spectroscopy:

Fig. S1 represents Raman spectra of  $\text{PdMPAV}_2$  and supported with various supports like titania, zirconia, alumina, niobia and silica. In  $\text{PdMPAV}_2$  Raman spectra, a sharp peak at  $1000\text{ cm}^{-1}$  related to  $\text{M} = \text{O}_t$  vibration of Keggin ion and two small peak  $256\text{ cm}^{-1}$  and  $630\text{ cm}^{-1}$  are also Raman characteristic band of MPA Keggin structure<sup>1</sup>. In all supported catalysts the peak at  $1000\text{ cm}^{-1}$  was present but the intensity of the peak was poor compared to pure  $\text{PdMPAV}_2$  as only twenty weight percentage of  $\text{PdMPAV}_2$  was loaded in the oxide support. For the alumina supported catalysts the broad peak at  $430\text{ cm}^{-1}$  is corresponds to  $\alpha\text{-Al}_2\text{O}_3$ <sup>2</sup>. Zirconia supported catalyst also exhibited the main characteristic peaks of  $\text{ZrO}_2$  at  $486\text{ cm}^{-1}$  and  $658\text{ cm}^{-1}$ . Moreover, the Raman profile of  $\text{PdMPAV}_2/\text{SiO}_2$  mainly contained the peak at  $500\text{ cm}^{-1}$  which belong to  $\text{SiO}_2$ <sup>3</sup>. The broad peak at  $700\text{ cm}^{-1}$  for Raman profile of niobia supported catalyst represented to the characteristic peak of niobia. For titania supported catalyst the three

main peaks at 380 cm<sup>-1</sup>, 540 cm<sup>-1</sup> and 750 cm<sup>-1</sup> are related to anatase phase of titania<sup>4</sup>. The Raman spectra of all supported catalysts mainly contained the peaks corresponds to the characteristic peak of the support material.

### **Determination of Metal dispersion, Surface Area and Particle size by Chemisorption:**

The metal dispersion factor in a metal catalyst which is supported with different supports are generally described as the proportional ratio of the total number of surface atoms and the total number of atoms in the catalyst. This ranges of this factor is from 0 to 1, where 1 correlated to the atomic level dispersion of the metal on the catalyst support (most of the cases it may not achieve unity).<sup>5, 6</sup> The normalized equations to measure the metal dispersion, active metal surface area and metal crystallite size are provided bellow:

$$\text{Dispersion (\%)} = \frac{\text{Uptake } \left( \frac{\mu\text{mol}}{\text{gcat}} \right)}{\text{Total metal } \left( \frac{\mu\text{mol}}{\text{gcat}} \right)} \times 100$$

Metal area = Metal cross sectional area × No. of metal atoms on surface

$$\text{Particle size (nm)} = \frac{6000}{\text{total metal } \left( \frac{\text{m}^2}{\text{gcat}} \right) \times \rho \left( \frac{\text{g}}{\text{cc}} \right)}$$

ρ = metal density

### **Product Analysis by Gas Chromatography (GC/GC-MS):**

All the reactants, products and intermediate are confirmed and analyzed by GC-MS (Model QP 5050 supplied by M/S. Shimadzu Instruments Corporation, Japan) and GC (Shimadzu 2010) respectively. The GC is equipped with flame ionization detector (FID) and INNO Wax capillary column (diameter: 0.25 mm, length: 30 m) is used for the separation of the reaction mixtures. The product and reactant mixture which are collected from the reactor was added into the organic solvents (methanol or acetone) and equal amount of an internal standard (anisole) was added before starting the GC analysis. The GC programming conditions are different for different reactions. The temperature of the injector is 250 °C, the temperature of oven/column is usually 80 – 280 °C with the ramping rate of 10 °C min<sup>-1</sup> and holding time is

3 and 5 minutes for starting and the end time of the analysis respectively. The FID temperature is 300 °C.

$$\text{The conversion of reactant} = \left( \frac{\text{Furfural}_{\text{initial}} - \text{Furfural}_{\text{final}}}{\text{Furfural}_{\text{initial}}} \right) \times 100$$

$$\text{Selectivity of the product} = \left[ \frac{P_i}{\sum P_i} \right] \times 100 \quad (\text{where } i = \text{product, reactant and intermediate for particular reaction and } P \text{ is targeted product.}) \text{ where reactant is furfural.}$$

$$\text{Yield} = \left( \frac{\text{Conversion} \times \text{Selectivity}}{100} \right)$$

The carbon balance was attained by calculating the amount of carbon in liquid phase reaction by GC-FID and measured by the equation,<sup>7</sup>

$$\text{Carbon balance (\%)} = 100 \times \frac{(\text{moles of carbon out (all products and reactants)})}{\text{moles of carbon in (reactant)}}$$

Here reactant is furfural. Products are THFAL, FAL, MeTHF, MeF and 1,5 pentanediol which mainly depends on reaction condition and catalysts.

The initial turn over frequency (TOF) of the catalyst was calculated by this equation.

$$\text{TOF} = \frac{(\text{moles of product})}{\{(\text{moles of metal in catalyst}) \times (\text{dispersion}) \times (\text{reaction time})\}}$$

The product mentioned in the equation is the targeted product, THFAL.

### Hot Filtration Test:

A hot filtration test was also investigated to determine the heterogeneity of the catalyst under the optimized reaction condition. 100 ml Parr Autoclave was pressurized with 2.5 H<sub>2</sub> pressure and loaded with furfural (2.402 wt.%), catalyst (0.8 wt.%) and 25 ml isopropanol and set the reaction temperature at 150 °C. After one hour of reaction, the catalyst was filtered and

separated from the reaction solution; furthermore, the reaction was carried out for 2 h. The yield of THFAL was not enhanced which is confirmed by GC-MS analysis. It can be interpreted that this catalyst is reusable as well as stable for this reaction without leaching of the metal. The tests confirmed that the catalyst was stable and reusable under the reaction condition.

### Recyclability tests:

After the completion of the reaction the catalyst was washed with MeOH with two or three times and dried in 60 °C oven for overnight. After that the catalyst was employed for the next catalytic cycle. The conversion and the selectivity of the reactant and products after the reaction were analyzed by GC.

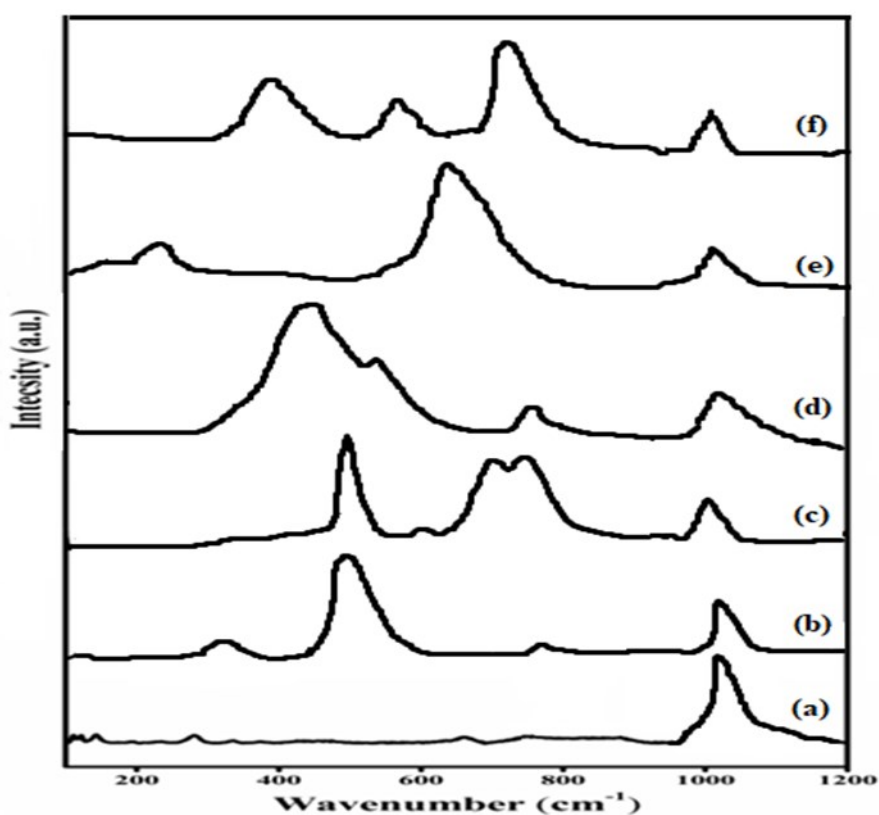

Fig. S1: Raman profiles of palladium exchanged vanadium incorporate molybdophosphoric acid on different supports. (a) PdMPAV<sub>2</sub> (b) PdMPAV<sub>2</sub>/Al<sub>2</sub>O<sub>3</sub> (c) PdMPAV<sub>2</sub>/ZrO<sub>2</sub> (d) PdMPAV<sub>2</sub>/SiO<sub>2</sub> (e) PdMPAV<sub>2</sub>/Nb<sub>2</sub>O<sub>5</sub> (f) PdMPAV<sub>2</sub>/TiO<sub>2</sub>

Table S1: Surface area of supports

| Support                        | Surface area (m <sup>2</sup> g <sup>-1</sup> ) |
|--------------------------------|------------------------------------------------|
| Al <sub>2</sub> O <sub>3</sub> | 100                                            |
| ZrO <sub>2</sub>               | 75                                             |
| TiO <sub>2</sub>               | 80                                             |
| Nb <sub>2</sub> O <sub>5</sub> | 60                                             |
| SiO <sub>2</sub>               | 395                                            |

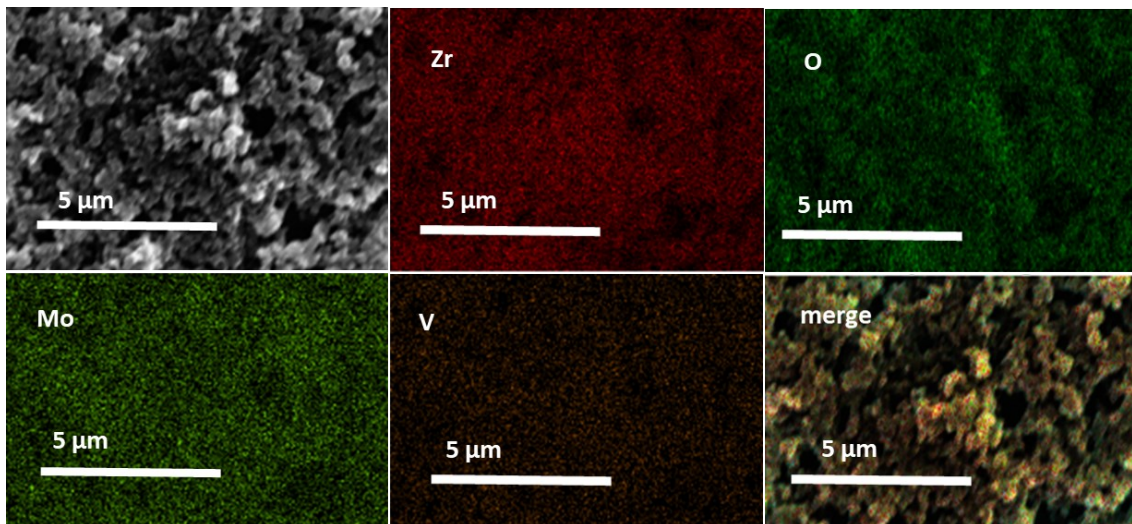

(a)

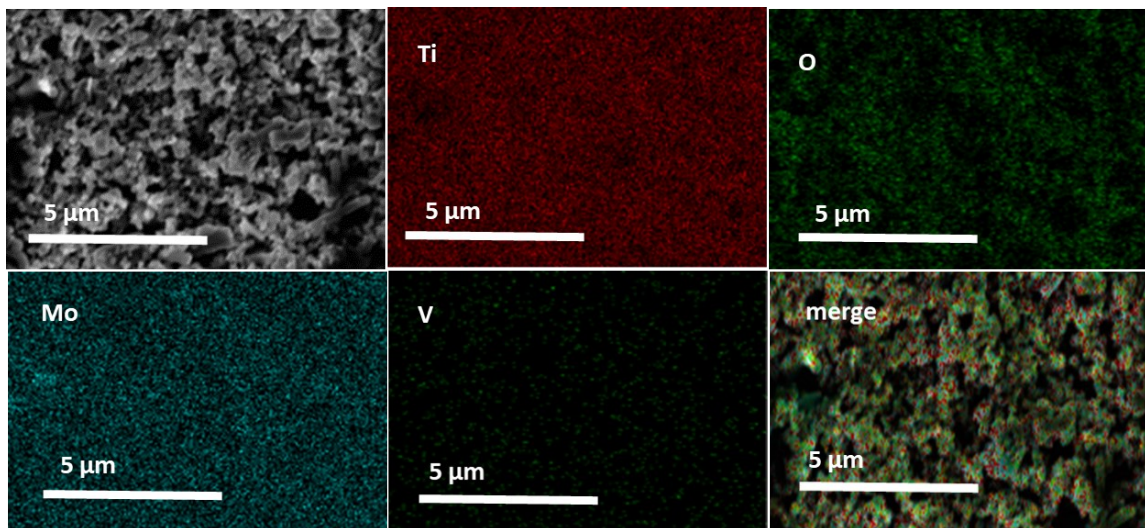

(b)

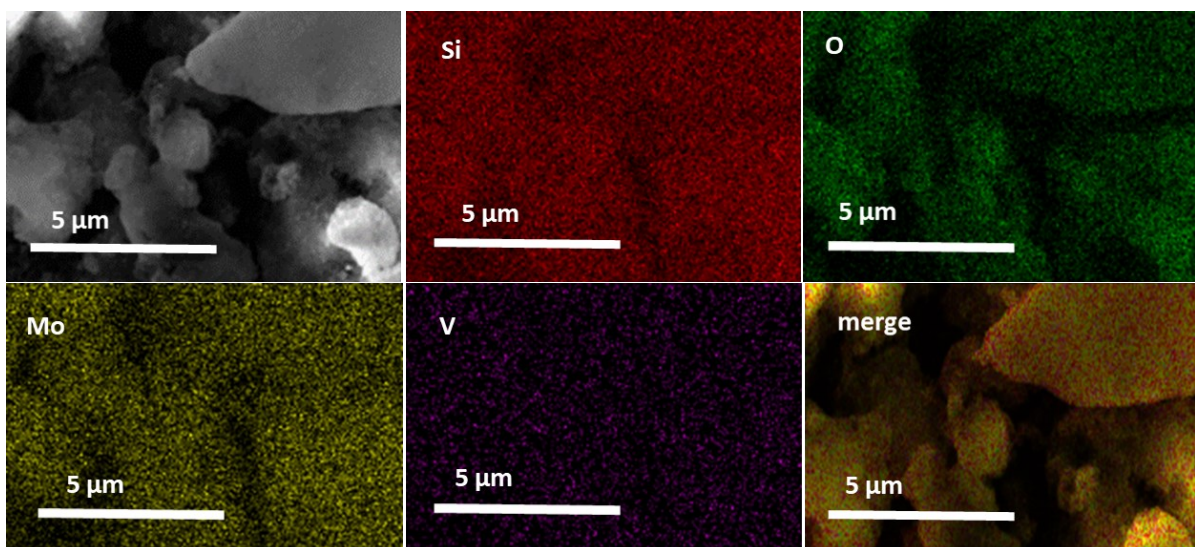

(c)

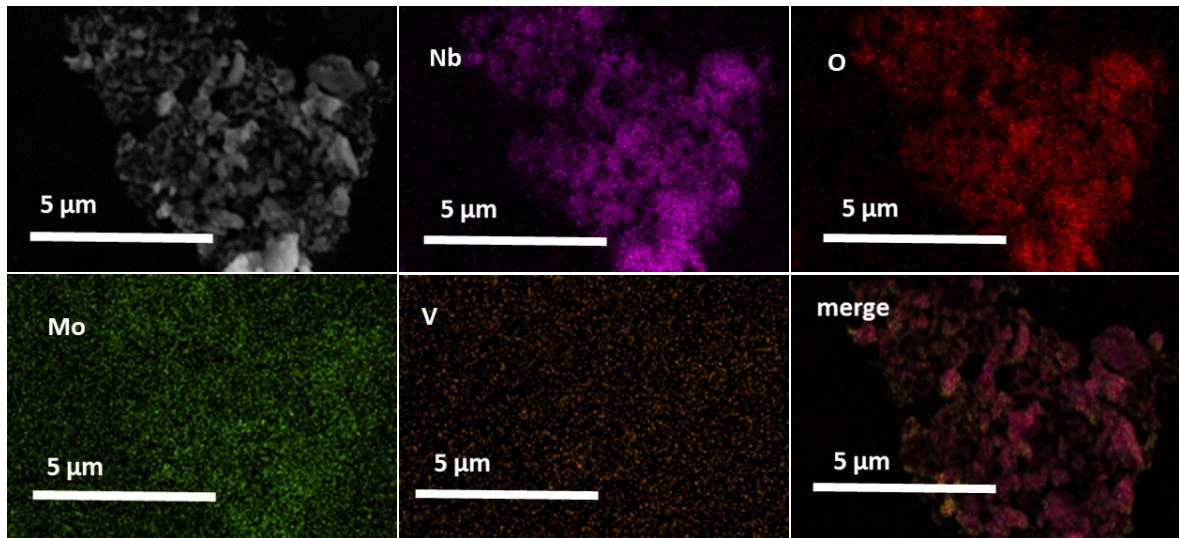

(d)

Fig. S2: Elemental mapping of (a) PdMPAV<sub>2</sub>/ZrO<sub>2</sub> (b) PdMPAV<sub>2</sub>/TiO<sub>2</sub> (c) PdMPAV<sub>2</sub>/SiO<sub>2</sub> (d) PdMPAV<sub>2</sub>/Nb<sub>2</sub>O<sub>5</sub>

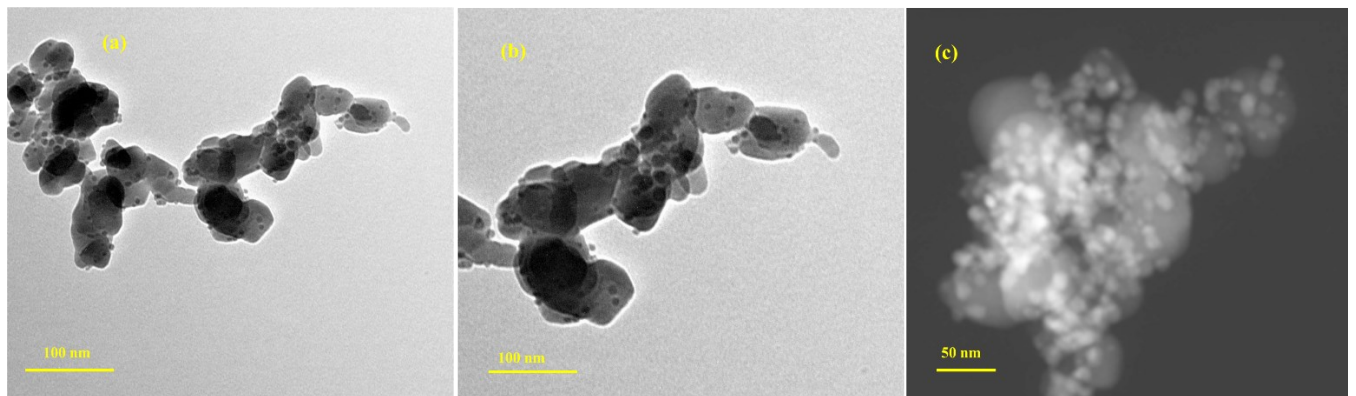

Fig S3: (a) & (b) TEM and (c) STEM of PdMPAV<sub>2</sub>/Al<sub>2</sub>O<sub>3</sub>

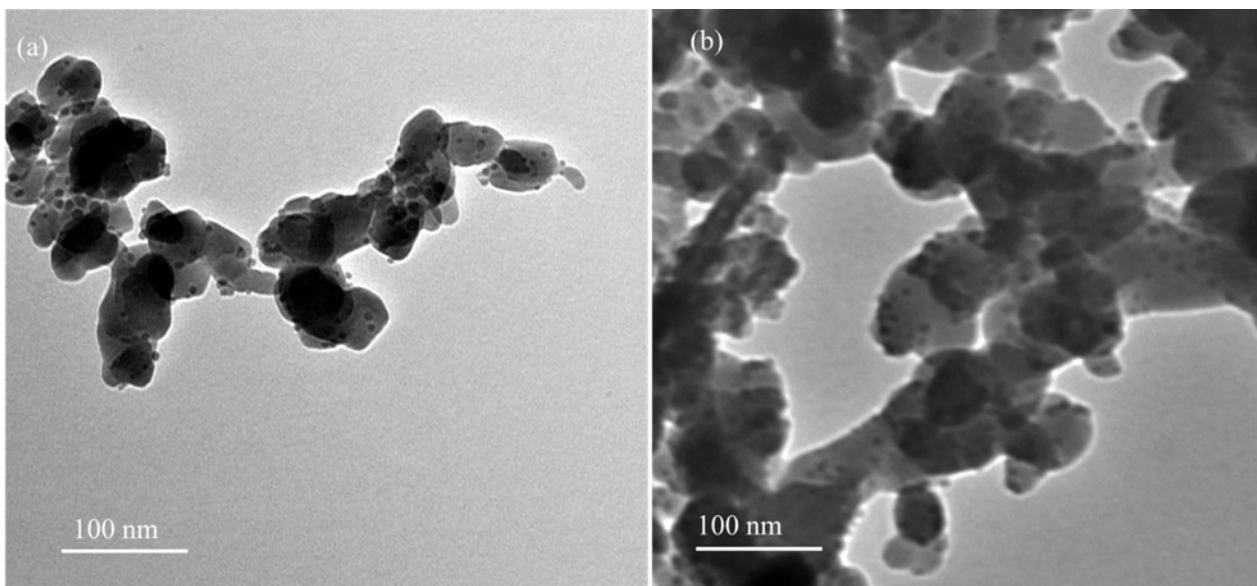

Fig. S4: TEM images of (a) fresh PdMPAV<sub>2</sub>/Al<sub>2</sub>O<sub>3</sub> (b) used PdMPAV<sub>2</sub>/Al<sub>2</sub>O<sub>3</sub>

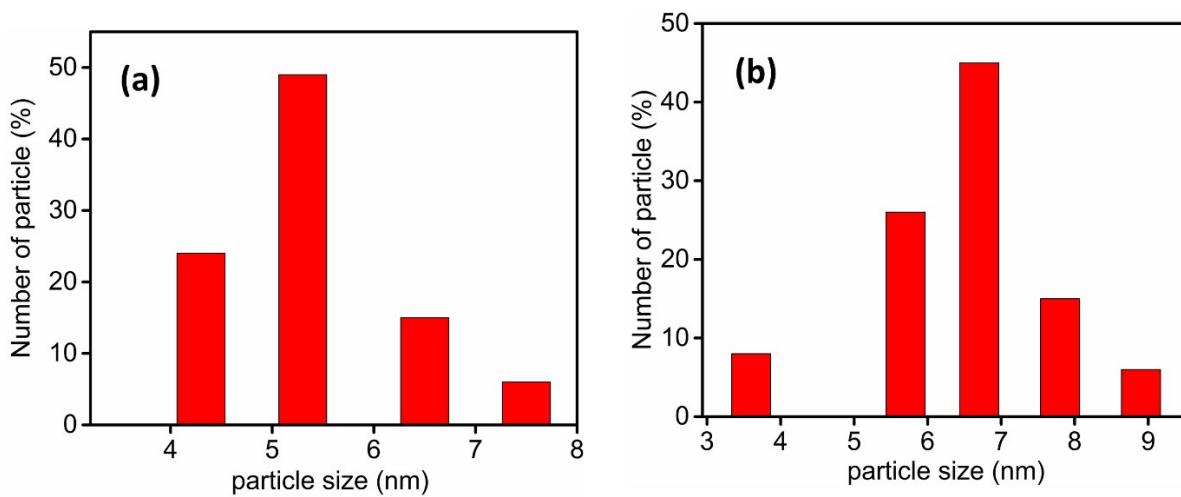

Fig.S5: Particle size distribution of (a) Fresh PdMPAV<sub>2</sub>/Al<sub>2</sub>O<sub>3</sub> and (b) used PdMPAV<sub>2</sub>/Al<sub>2</sub>O<sub>3</sub> catalyst.



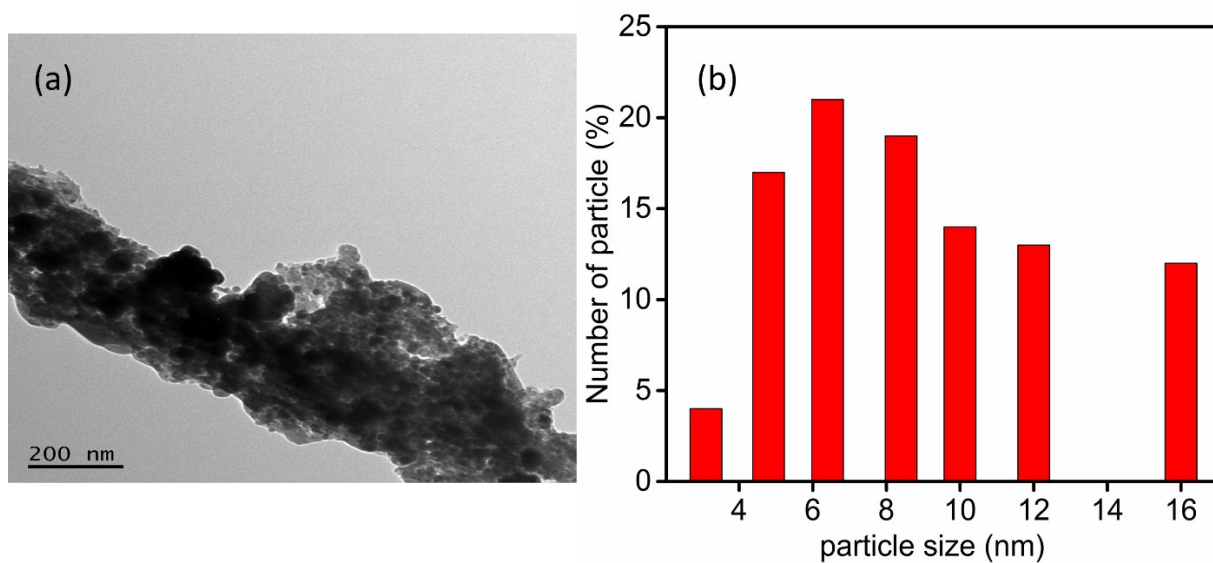

Fig. S6: (a) TEM image of Pd/Al<sub>2</sub>O<sub>3</sub> catalyst (b) particle size obtained from TEM

Table S2: Activity of different catalysts

| Catalyst                                            | Furfural Conversion (%) | THFAL selectivity (%) | FAL selectivity (%) | MeTHF selectivity (%) | MeF selectivity (%) | 1,5 pentanediol selectivity (%) | Carbon balance (%) |
|-----------------------------------------------------|-------------------------|-----------------------|---------------------|-----------------------|---------------------|---------------------------------|--------------------|
| Pd/Al <sub>2</sub> O <sub>3</sub>                   | 65                      | 68.50                 | 22.30               | 0                     | 0.08                | 9.12                            | 98.4               |
| Pd-V/Al <sub>2</sub> O <sub>3</sub>                 | 67.1                    | 66.34                 | 26.06               | 0                     | 0                   | 7.60                            | 97.6               |
| PdMPA/Al <sub>2</sub> O <sub>3</sub>                | 81.8                    | 80                    | 8                   | 0                     | 0                   | 12                              | 98.2               |
| PdMPAV <sub>1</sub> /Al <sub>2</sub> O <sub>3</sub> | 87.1                    | 88.3                  | 7.7                 | 0                     | 0                   | 4                               | 98.1               |
| PdMPAV <sub>2</sub> /Al <sub>2</sub> O <sub>3</sub> | 100                     | 95                    | 0                   | 5                     | 0                   | 0                               | 98.3               |

Table S3: CO-chemisorption studies

| Different catalyst                            | Active metal surface area ( $\text{m}^2\text{g}^{-1}$ ) | Dispersion factor (%) | Metal Particle Diameter (nm) |
|-----------------------------------------------|---------------------------------------------------------|-----------------------|------------------------------|
| Pd/ $\text{Al}_2\text{O}_3$                   | 42.5                                                    | 15.7 $\pm$ 3.5        | 7.2                          |
| Pd-V/ $\text{Al}_2\text{O}_3$                 | 43.6                                                    | 17.5 $\pm$ 3.6        | 7.0                          |
| PdMPA/ $\text{Al}_2\text{O}_3$                | 62.1                                                    | 23.5 $\pm$ 3.6        | 6.4                          |
| PdMPAV <sub>1</sub> / $\text{Al}_2\text{O}_3$ | 69.2                                                    | 27.8 $\pm$ 3.4        | 6.3                          |
| PdMPAV <sub>2</sub> / $\text{Al}_2\text{O}_3$ | 75.8                                                    | 33.8 $\pm$ 3.8        | 5.3                          |

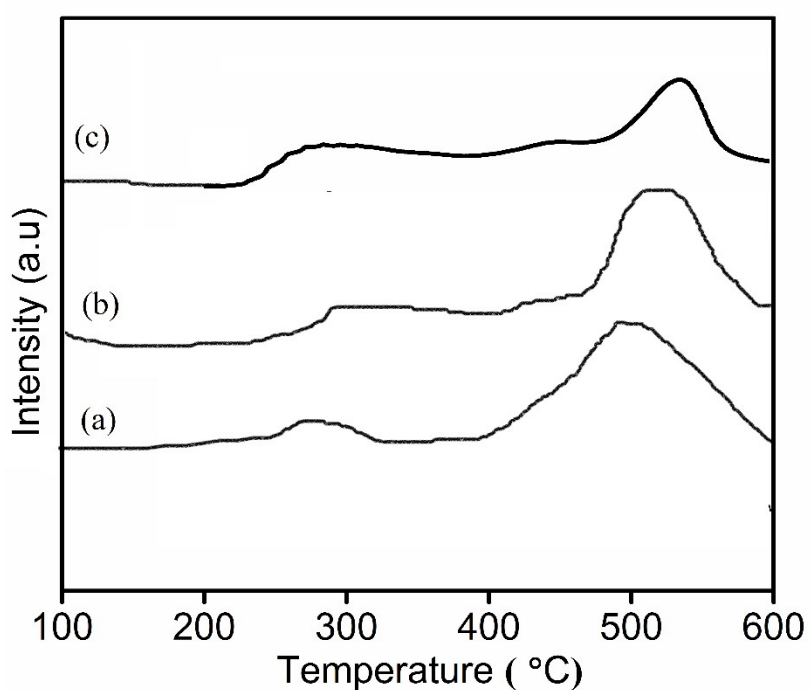

Fig S7:  $\text{NH}_3$ -TPD of (a) PdMPA/ $\text{Al}_2\text{O}_3$  (b) PdMPAV<sub>1</sub>/ $\text{Al}_2\text{O}_3$  (c) PdMPAV<sub>2</sub>/ $\text{Al}_2\text{O}_3$

Table S4: Acidity obtained from  $\text{NH}_3$ -TPD results

| Different catalyst                            | Total acidity ( $\text{mmol g}^{-1}$ ) |
|-----------------------------------------------|----------------------------------------|
| PdMPA/ $\text{Al}_2\text{O}_3$                | 1.543                                  |
| PdMPAV <sub>1</sub> / $\text{Al}_2\text{O}_3$ | 1.312                                  |
| PdMPAV <sub>2</sub> / $\text{Al}_2\text{O}_3$ | 1.214                                  |

Table S5: Comparison of PdMPAV<sub>2</sub>-Al<sub>2</sub>O<sub>3</sub> catalyst with previously reported catalysts

| Catalyst                                                          | Reaction time (h) | Temperature (°C) | H <sub>2</sub> Pressure (MPa) | Solvent                      | Furfural conversion (%) | FAL Conversion (%) | THFA L Yield (%) | TOF (h <sup>-1</sup> ) | THFAL yield g <sub>catalyst</sub> <sup>-1</sup> | Reference     |
|-------------------------------------------------------------------|-------------------|------------------|-------------------------------|------------------------------|-------------------------|--------------------|------------------|------------------------|-------------------------------------------------|---------------|
| Pd/MFI (3 wt% Pd)                                                 | 5                 | 220              | 3.4                           | isopropanol                  | 93                      | -                  | 83               | 14                     | 65.4                                            | <sup>8</sup>  |
| Ni/g-Al <sub>2</sub> O <sub>3</sub> (15 wt% Ni)                   | 2                 | 80               | 4                             | Ethanol                      | -                       | 99.8               | 99.5             | 24                     | 87.6                                            | <sup>9</sup>  |
| Pd-Ir-ReO <sub>x</sub> /SiO <sub>2</sub>                          | 2                 | 50               | 6                             | water                        | >99.9                   | -                  | 78               | 30.7                   | 130.3                                           | <sup>10</sup> |
| Ni/C-500 (derived from MOF)                                       | 2                 | 120              | 1                             | 2-propanol                   | 100                     | -                  | 99               | 28.4                   | 120.7                                           | <sup>11</sup> |
| Rh/C (5 wt% Rh)                                                   | 32                | 30               | 1                             | N, N-dimethylacetamide (DMA) | 96                      | -                  | 95               | 30                     | 121.2                                           | <sup>12</sup> |
|                                                                   | 16                | 30               | 0.1                           | DMA                          | -                       | 100                | 96               | 31                     | 123                                             |               |
| Ni-Co/SBA-15                                                      | 2                 | 90               | 5                             | Ethanol                      |                         |                    | 92               | 20.3                   | 89.0                                            | <sup>13</sup> |
| Pd-Ir-ReO <sub>x</sub> /SiO <sub>2</sub>                          | 8                 | 40               | 6                             | water                        | 99.9                    |                    | 66.8             | 30                     | 78.9                                            | <sup>14</sup> |
| Pt-Li/Co <sub>2</sub> AlO <sub>4</sub>                            | 24                | 130              | 1.5                           | ethanol                      |                         |                    | 31.3%            | 8                      | 45.8                                            | <sup>15</sup> |
| PdMPAV <sub>2</sub> /Al <sub>2</sub> O <sub>3</sub> (0.5 wt.% Pd) | 6                 | 150              | 2.5                           | isopropanol                  | 100                     | -                  | 95               | 32.6                   | 118.7                                           | This work     |
|                                                                   | 2                 | 150              | 1.5                           | isopropanol                  | -                       | 100                | 100              | 33.7                   | 125                                             | This work     |

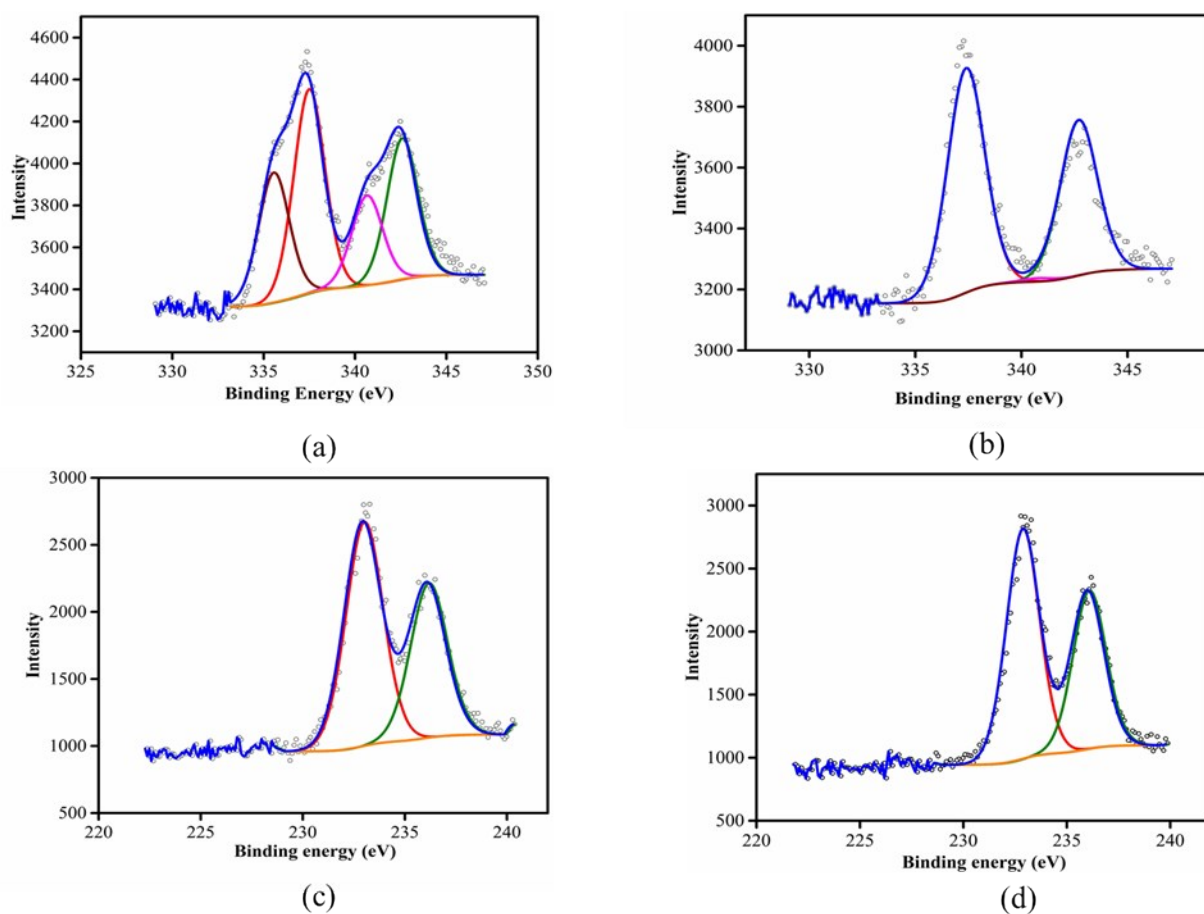

Fig. S8: XPS spectra of PdMPAV<sub>2</sub>-Al<sub>2</sub>O<sub>3</sub> (a) Pd-3d for reduced (b) Pd-3d for fresh (c) Mo-3d for reduced (d) Mo-3d for fresh

Table S6: Binding energy values of V and Al

| Catalyst                                                                         | Al 2p <sub>3/2</sub> (e.V) | V 2p <sub>3/2</sub> (e.V) |
|----------------------------------------------------------------------------------|----------------------------|---------------------------|
| Reduced catalyst<br>PdMPAV <sub>2</sub> /Al <sub>2</sub> O <sub>3</sub>          | 74.8                       | 517.9                     |
| Catalyst before reduction<br>PdMPAV <sub>2</sub> /Al <sub>2</sub> O <sub>3</sub> | 74.5                       | 517.9                     |

Table S7: Carbon balance for effect of temperature, pressure, time and catalyst concentration

| Effect of time |                    | Effect of temperature |                    | Effect of H <sub>2</sub> Pressure |                    | Effect of catalyst concentration |                    | Effect of initial concentration of furfural |                    |
|----------------|--------------------|-----------------------|--------------------|-----------------------------------|--------------------|----------------------------------|--------------------|---------------------------------------------|--------------------|
| Time (h)       | Carbon balance (%) | Temperature (°C)      | Carbon balance (%) | H <sub>2</sub> pressure           | Carbon balance (%) | Catalyst concentration (wt.%)    | Carbon balance (%) | Furfural initial conc. (wt.%)               | Carbon balance (%) |
| 2              | 98.6               | 90                    | 98.6               | 1                                 | 98.7               | 0.4                              | 98.5               | 1.2                                         | 98.5               |
| 4              | 98.4               | 120                   | 98.5               | 1.5                               | 98.4               | 0.6                              | 98.6               | 2.4                                         | 98.3               |
| 6              | 98.3               | 150                   | 98.3               | 2                                 | 98.3               | 0.8                              | 98.3               | 3.6                                         | 98.1               |
| 8              | 98.3               | 180                   | 98.0               | 2.5                               | 98.1               | 1                                | 98.1               | 4.8                                         | 95.6               |
| -              | -                  | 200                   | 95.3               | 3                                 | 98.3               | 1.2                              | 98.1               | 6.0                                         | 94.3               |

Table S8: Carbon balance in recyclability tests

| No of cycles | Carbon balance (%) |
|--------------|--------------------|
| 1            | 98.3               |
| 2            | 98.1               |
| 3            | 98.3               |
| 4            | 97.9               |
| 5            | 98.1               |

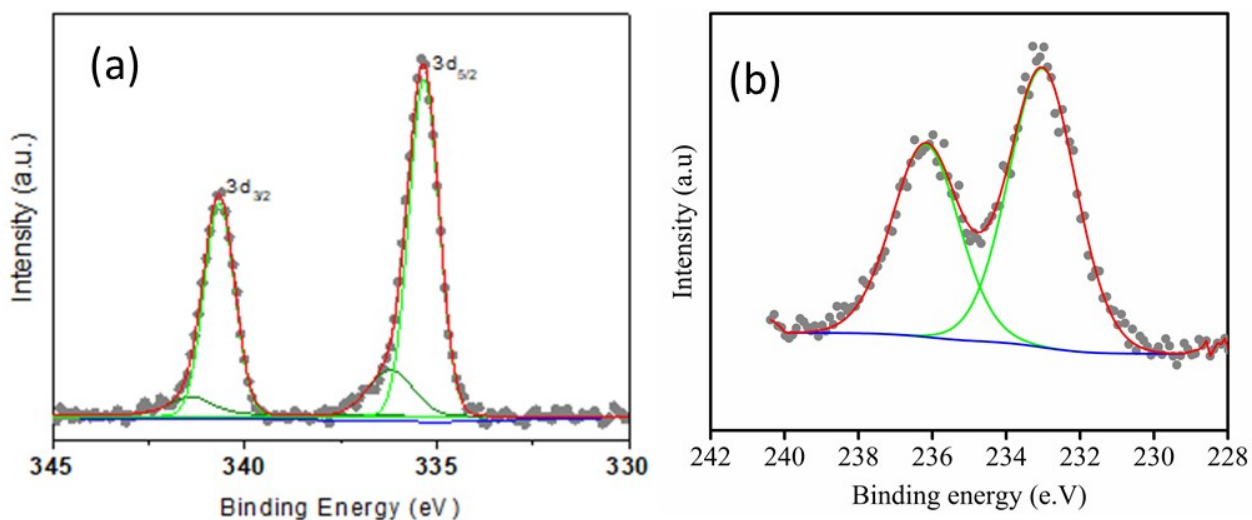

Fig. S9: XPS of (a) Pd-3d (b) Mo-3d for used PdMPAV<sub>2</sub>-Al<sub>2</sub>O<sub>3</sub> catalyst

Table S9: Binding energy values of used PdMPAV<sub>2</sub>-Al<sub>2</sub>O<sub>3</sub> catalyst

| Catalyst                                                | V 2p (e.V) | O 1s (e.V) | P 2p (e.V) | Al 2p (e.V) |
|---------------------------------------------------------|------------|------------|------------|-------------|
| Used                                                    | 517.7      | 531.8      | 134.7      | 74.7        |
| PdMPAV <sub>2</sub> -<br>Al <sub>2</sub> O <sub>3</sub> |            | 530.7      |            |             |

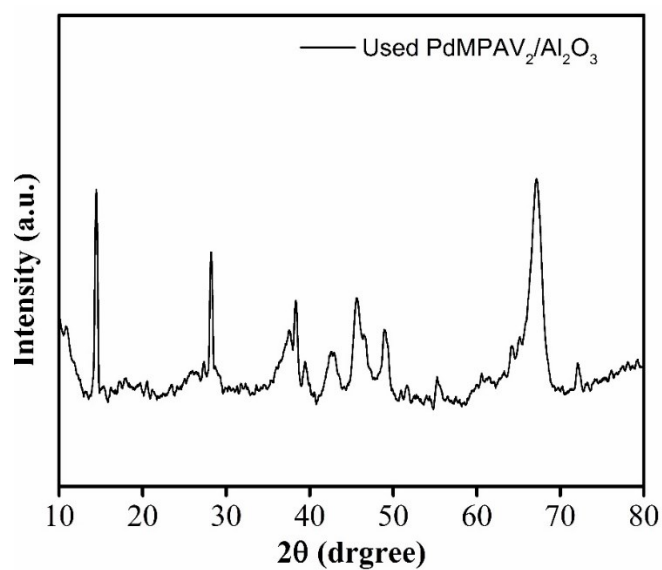

Fig. S10: XRD of used PdMPAV<sub>2</sub>-Al<sub>2</sub>O<sub>3</sub> catalyst

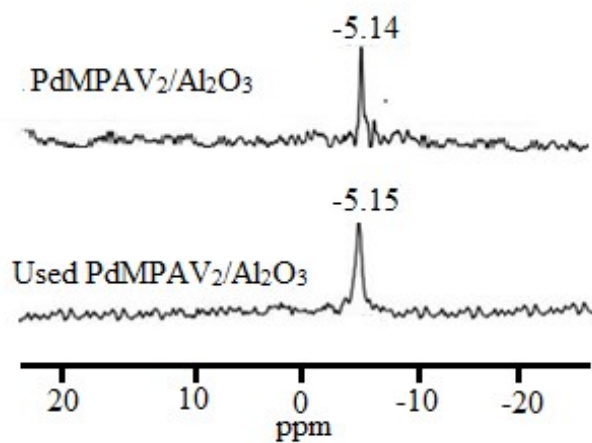

Fig. S11:  $^{31}\text{P}$  NMR of PdMPAV<sub>2</sub>-Al<sub>2</sub>O<sub>3</sub> and Used PdMPAV<sub>2</sub>-Al<sub>2</sub>O<sub>3</sub> catalyst

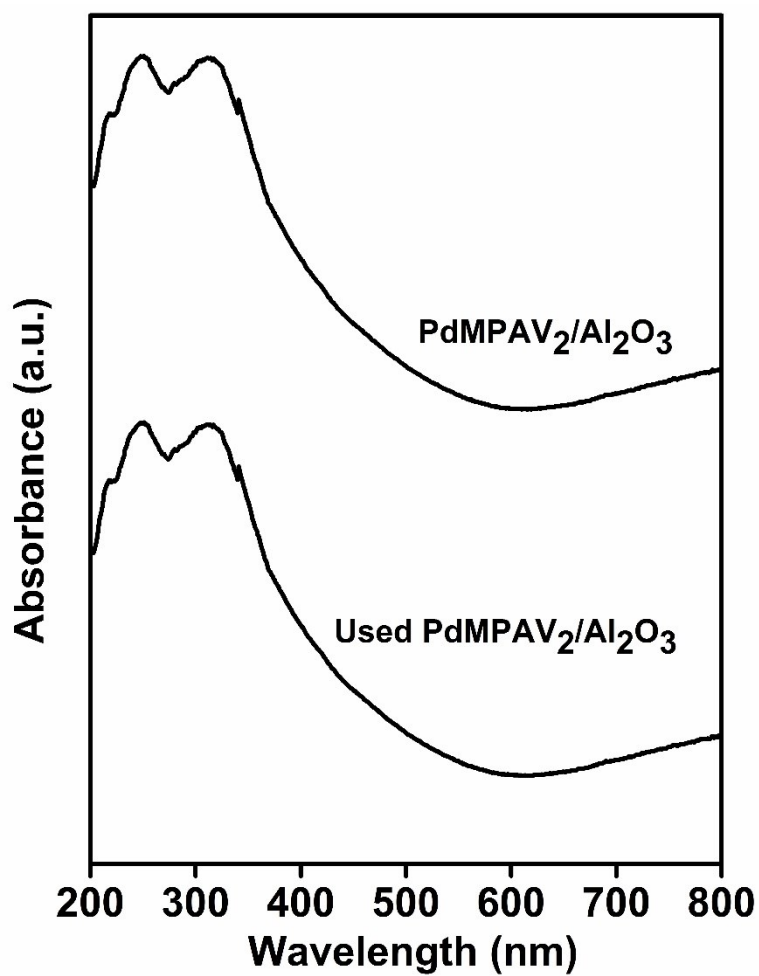

Fig. S12: UV visible spectra of PdMPAV<sub>2</sub>-Al<sub>2</sub>O<sub>3</sub> and Used PdMPAV<sub>2</sub>-Al<sub>2</sub>O<sub>3</sub> catalyst

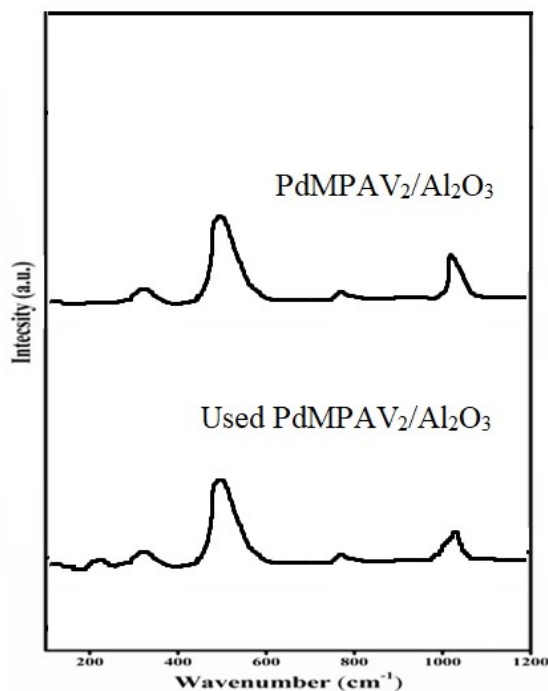

Fig. S13: Raman spectra of PdMPAV<sub>2</sub>-Al<sub>2</sub>O<sub>3</sub> and Used PdMPAV<sub>2</sub>-Al<sub>2</sub>O<sub>3</sub> catalyst

## References

1. K. V. Rao, P. Rao, P. Nagaraju, P. S. Prasad and N. Lingaiah, *Journal of Molecular Catalysis A: Chemical*, 2009, **303**, 84-89.
2. J. Gangwar, B. K. Gupta, S. K. Tripathi and A. K. Srivastava, *Nanoscale*, 2015, **7**, 13313-13344.
3. G. Dovbeshko, O. Fesenko, V. Boyko, V. Romanyuk, V. Moiseyenko, V. Gorelik, L. Dolgov, V. Kiisk and I. Sildos, 2012.
4. H. A. Mahmoud, K. Narasimharao, T. T. Ali and K. M. Khalil, *Nanoscale research letters*, 2018, **13**, 48.
5. I. Langmuir, *Journal of the American Chemical society*, 1918, **40**, 1361-1403.
6. I. Langmuir, *Journal of the American chemical society*, 1916, **38**, 2221-2295.
7. J. Lee, Y. Xu and G. W. Huber, *Applied Catalysis B: Environmental*, 2013, **140**, 98-107.
8. N. S. Biradar, A. M. Hengne, S. N. Birajdar, P. S. Niphadkar, P. N. Joshi and C. V. Rode, *ACS Sustainable Chemistry & Engineering*, 2014, **2**, 272-281.



9. S. Sang, Y. Wang, W. Zhu and G. Xiao, *Research on Chemical Intermediates*, 2017, **43**, 1179-1195.
10. S. Liu, Y. Amada, M. Tamura, Y. Nakagawa and K. Tomishige, *Green Chemistry*, 2014, **16**, 617-626.
11. Y. Su, C. Chen, X. Zhu, Y. Zhang, W. Gong, H. Zhang, H. Zhao and G. Wang, *Dalton Transactions*, 2017, **46**, 6358-6365.
12. B. M. Matsagar, C.-Y. Hsu, S. S. Chen, T. Ahamad, S. M. Alshehri, D. C. Tsang and K. C.-W. Wu, *Sustainable Energy & Fuels*, 2020, **4**, 293-301.
13. S. Li, Y. Wang, L. Gao, Y. Wu, X. Yang, P. Sheng and G. Xiao, *Microporous and Mesoporous Materials*, 2018, **262**, 154-165.
14. Y. Nakagawa, M. Tamura and K. Tomishige, *Catalysis Surveys from Asia*, 2015, **19**, 249-256.
15. R. Karinen, K. Vilonen and M. Niemelä, *ChemSusChem*, 2011, **4**, 1002-1016.
